# Supplementary material for: Rational design of biotinylated probes: fluorescent turn-on detection of (strept)avidin and bioimaging in cancer cells
Source: Royal Society of Chemistry journal article supplement (doi:10.1039/c4cc03315a), 2014-06-11
Supplement: c4cc03315a1.pdf [file c4cc03315a1.pdf]

## Rational Design of Biotinylated Probes: Fluorescent Turn-On

### Detection of (Strept)avidin and Bioimaging in Cancer Cells

Qian Sun<sup>a</sup>, Junhong Qian<sup>\*a</sup>, Haiyu Tian<sup>a</sup>, Liping Duan<sup>b</sup> and Weibing Zhang<sup>\*a</sup>

<sup>a</sup> Shanghai Key Laboratory of Functional Materials Chemistry, School of Chemistry and Molecular Engineering, East China University of Science and Technology, Shanghai, 200237, China

<sup>b</sup> National Institute of Parasitic Diseases, Chinese Center for Disease Control and Prevention, Shanghai, 200032, China.

E-mail: junhongqian@ecust.edu.cn; weibingzhang@ecust.edu.cn

Tel: +86-21-64253068; Fax: +86-21-64233161

## Supporting Information

### Contents

|                                                                                  |    |
|----------------------------------------------------------------------------------|----|
| Experimental-----                                                                | 2  |
| NMR and ESI spectra of SPS1-2 -----                                              | 7  |
| Normalized UV-vis and fluorescence spectra of SPS1-2 in various solvents-----    | 9  |
| Normalized UV-vis and fluorescence spectra of RC1-2 in various solvents-----     | 10 |
| The emission spectra of RC1-2 with and without SA/AV -----                       | 11 |
| The emission spectra of RC3 with and without SA/AV -----                         | 12 |
| The selectivity and competition of RC2 -----                                     | 13 |
| The the fluorescence decay curves of SPS2 in different systems-----              | 14 |
| Titration of AV/SA to SPS2 solution -----                                        | 15 |
| The proposed binding models of SPS2 to AV/SA -----                               | 16 |
| Flourescent imaging in living-cell-----                                          | 17 |
| The cytotoxicity of SPS2 on HeLa cells-----                                      | 18 |
| The photophysical data of SPS1-2 and RC1-2 in different solvents-----            | 19 |
| The life time and relative amplitudes $\alpha$ of SPS2 in different systems----- | 20 |

## Experiments

### 1. Synthesis of probes SPS1-2

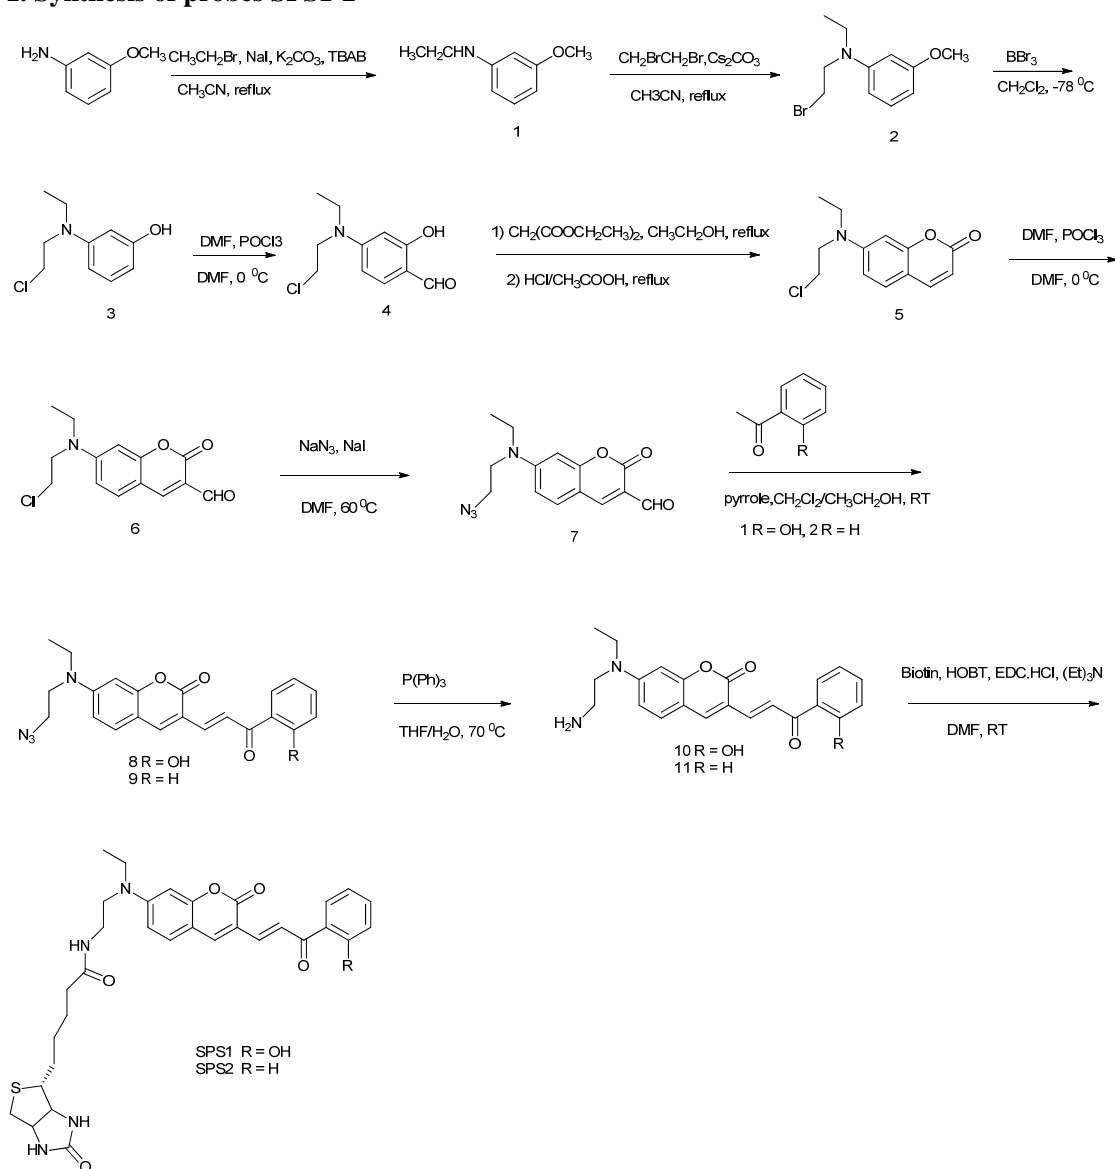

**Scheme 1** synthesis procedures of SPS1 and SPS2.

**Synthesis of compound 1:** Commercially available 3-methoxyaniline (1.67 g, 13.6 mmol),  $\text{K}_2\text{CO}_3$  (2.82 g, 20.4 mmol), NaI (203.9 mg, 1.36 mmol) and TBAB (438 mg, 1.36 mmol) were added to acetonitrile (80 mL) in a 250 mL flask. 1.48 g (13.6 mmol) of bromoethane were added slowly to the above solution, and the mixed solution was refluxed for 8 h. After filtration, the solvent was removed under reduced pressure, and the brown residue was purified by column chromatography to give colourless oil (1.14 g, yield: 55.4%).  $^1\text{H NMR}$  (400MHz,  $\text{CDCl}_3$ )  $\delta$  (ppm): 7.08 (t,  $J = 8.1$  Hz, 1H), 6.26 (dd,  $J_1 = 1.9$  Hz,  $J_2 = 8.1$  Hz, 1H), 6.22 (dd,  $J_1 = 1.5$  Hz,  $J_2 = 8.10$  Hz, 1H), 6.16 (s, 1H), 3.77 (s, 3H), 3.14 (q,  $J = 7.2$  Hz, 2H), 1.25 (t,  $J = 7.2$  Hz, 3H).

**Synthesis of compound 2:** 12.42 g (66.1 mmol) of 1,2-dibromoethane were added slowly to acetonitrile (80 mL) with compound **1** (1.00 g, 6.61 mmol) and  $\text{Cs}_2\text{CO}_3$  (3.23 g, 9.92 mmol). The above solution was refluxed for 18 h. After filtration, the solvent was removed under reduced pressure, and the brown residue was purified by column chromatography to give a brown oil (1.43

g, yield: 88.7%). <sup>1</sup>H NMR (400MHz, CDCl<sub>3</sub>) δ (ppm): 7.08 (t, J = 8.1 Hz, 1H), 6.26 (dd, J<sub>1</sub> = 1.9 Hz, J<sub>2</sub> = 8.1 Hz, 1H), 6.22 (dd, J<sub>1</sub> = 1.5 Hz, J<sub>2</sub> = 8.1 Hz, 1H), 6.16 (s, 1H), 3.77 (s, 3H), 3.66 (t, J = 8.3 Hz, 2H), 3.46 (t, J = 8.3 Hz, 2H), 3.40 (q, J = 7.0 Hz, 2H), 1.18 (t, J = 7.0 Hz, 3H).

**Synthesis of compound 3:** Under nitrogen atmosphere and at -78 °C, 1 mL (10.6 mmol) BBr<sub>3</sub> was added slowly to 40 mL of compound **2** (1.05 g, 4.30 mmol) in dichloromethane. The solution was stirred at -78 °C for 30 min and at room temperature for another 3 h. Then the above solution was poured into 100 mL iced water and stirred for 10 minutes. The crude product was extracted with dichloromethane. The organic layer was washed with saturated NaHCO<sub>3</sub> (100 mL × 2) and brine (100 mL × 2), followed by concentrated under vacuo and purified by column chromatography to give a colourless oil (610 mg, yield: 61.6%). <sup>1</sup>H NMR (400MHz, DMSO-d<sub>6</sub>) δ (ppm): 9.17 (s, 1H), 6.96 (m, 1H), 6.15 - 6.05 (m, 3H), 3.71 (t, J = 7.3 Hz, 2H), 3.59 - 3.53 (m, 4H), 1.07 (t, J = 7.0 Hz, 3H).

**Synthesis of compound 4:** Under nitrogen atmosphere and at 0 °C, 1.5 mL POCl<sub>3</sub> (16.51 mmol) were injected slowly into 2 mL freshly distilled DMF and the mixed solution was stirred for 30 min. Then compound **3** (1.90 g, 8.26 mmol) in 3 mL freshly distilled DMF were injected slowly to the above mixture. After stirred at 0 °C for 30 min and at 60 °C for 4 h, the reaction mixture was poured into 100 mL ice-water and extracted with dichloromethane. The organic layer was washed with saturated NaHCO<sub>3</sub> (100 mL × 2) and brine (100 mL × 2), followed by concentrated under vacuo and purified by column chromatography to give a white solid (1.25 g, yield: 70.9%). <sup>1</sup>H NMR (400MHz, DMSO-d<sub>6</sub>) δ (ppm): 11.15 (s, 1H), 9.69 (s, 1H), 7.47 (d, J = 8.9 Hz, 1H), 6.41 (dd, J<sub>1</sub> = 8.9 Hz, J<sub>2</sub> = 2.3 Hz, 1H), 6.13 (d, J = 2.3 Hz, 1H), 3.75 (t, J = 5.3 Hz, 2H), 3.72 (t, J = 5.6 Hz, 2H), 3.49 (q, J = 7.1 Hz, 2H), 1.23 (t, J = 7.1 Hz, 3H).

**Synthesis of compound 5:** compound **4** (1.70 g, 7.96 mmol), diethyl malonate (1.53 g, 9.55 mmol) and 1 mL piperidine were dissolved in 100 mL absolute ethanol. After refluxed for 8 h, the solvent was removed under the reduced pressure. Then 40 mL of mixed solution [concentrated HCl : glacial acetic acid = 1:1 (v/v)] were added to the above crude product and refluxed for another 7 h. After cooled to room temperature the reaction solution was poured into 300 mL of ice water. The solution's pH was adjusted to ~5 with NaOH solution. The precipitate was purified with column chromatography to give a yellow solid (1.23 g, yield: 61.4%). <sup>1</sup>H NMR (400MHz, CDCl<sub>3</sub>) δ (ppm): 7.60 (d, J = 9.4 Hz, 1H), 7.29 (d, J = 8.7 Hz, 1H), 6.60 (dd, J<sub>1</sub> = 2.3 Hz, J<sub>2</sub> = 8.8 Hz, 1H), 6.53 (d, J = 2.3 Hz, 1H), 6.10 (d, J = 9.4 Hz, 1H), 3.70 (t, J = 6.6 Hz, 2H), 3.64 (t, J = 6.6 Hz, 2H), 3.50 (q, J = 7.1 Hz, 2H), 1.23 (t, J = 7.1 Hz, 3H).

**Synthesis of compound 6:** Under nitrogen atmosphere and at 0 °C, 1.5 mL POCl<sub>3</sub> (16.51 mmol) were injected slowly into freshly distilled DMF and stirred for 30 min. Then compound **5** (1.23 g, 4.89 mmol) in 5 mL freshly distilled DMF were injected slowly to the POCl<sub>3</sub>-DMF solution. After stirred at 0 °C for 30 min and at 60 °C for 4 h, the reaction solution was poured into 100 mL ice water. The solution's pH was adjusted to ~5 with NaOH solution. The precipitate was purified with column chromatography to give an orange-brown solid (800 mg, yield: 58.5%). <sup>1</sup>H NMR (400MHz, CDCl<sub>3</sub>) δ (ppm): 10.15 (s, 1H), 8.29 (s, 1H), 7.47 (d, J = 8.9 Hz, 1H), 6.68 (dd, J<sub>1</sub> = 1.8 Hz, J<sub>2</sub> = 8.9 Hz, 1H), 6.55 (d, J = 1.8 Hz, 1H), 3.77 (t, J = 6.6 Hz, 2H), 3.67 (t, J = 6.7 Hz, 2H), 3.50 (q, J = 7.1 Hz, 2H), 1.23 (t, J = 7.1 Hz, 3H).

**Synthesis of compound 7:** Compound **6** (1.2 g, 4.29 mmol), NaI (64.3 mg, 0.43 mmol) and NaN<sub>3</sub> (1.39 g, 21.45 mmol) were added to 5 mL freshly distilled DMF. After stirred under nitrogen at 80 °C for 6 h, the above solution was poured into 100 mL ice water and stirred for 10 minutes. The

precipitate was filtered to give an orange-brown solid (0.95 g, yield: 77.4%). <sup>1</sup>H NMR (400 MHz, CDCl<sub>3</sub>) δ (ppm): 10.14 (s, 1H), 8.28 (s, 1H), 7.47 (d, J = 9.0 Hz, 1H), 6.68 (dd, J<sub>1</sub> = 2.1 Hz, J<sub>2</sub> = 9.0 Hz, 1H), 6.54 (d, J = 2.1 Hz, 1H), 3.61-3.54 (m, 6H), 1.28 (t, J = 7.1 Hz, 3H).

**Synthesis of compounds 8 and 9:** Compound **7** (300 mg, 1.05 mmol) and 2-hydroxyacetophenone (256.8 mg, 1.89 mmol) were added to 20 mL of the mixed solvent [CH<sub>2</sub>Cl<sub>2</sub>/anhydrous CH<sub>3</sub>CH<sub>2</sub>OH = 1:1 (v/v)], then 10 drops of pyrrolidine were dropped into the above solution. The mixture was stirred at room temperature for 1 d, and the solvent was removed under reduced pressure. The residue was purified by column chromatography to give a bright red solid (280 mg, 66.1%). <sup>1</sup>H NMR (400MHz, DMSO-d<sub>6</sub>) δ (ppm): 12.58 (s, 1H), 8.55 (s, 1H), 8.15 (d, J = 15.4 Hz, 1H), 8.02 (d, J = 8.0 Hz, 1H), 7.77 (d, J = 15.3 Hz, 1H), 7.57-7.53 (m, 2H), 7.05-6.99 (m, 2H), 6.90 (d, J = 9.0 Hz, 1H), 6.74 (s, 1H), 3.67 (t, J = 5.4 Hz, 2H), 3.59 (t, J = 5.4 Hz, 2H), 3.55 (q, J = 7.0 Hz, 2H), 1.15 (t, J = 6.9 Hz, 3H). Compound **9** was obtained as a bright red solid (90 mg, 22.1%) by the same procedures with acetophenone (226 mg) instead of 2-hydroxyacetophenone. <sup>1</sup>H NMR (400 MHz, DMSO-d<sub>6</sub>) δ (ppm): 8.53 (s, 1H), 8.08-8.04 (m, 3H), 7.69-7.65 (m, 2H), 7.61-7.57 (m, 2H), 7.53 (d, J = 8.9 Hz, 1H), 6.89 (d, J = 8.8 Hz, 1H), 6.74 (s, 1H), 3.67 (t, J = 5.5 Hz, 2H), 3.59 (t, J = 5.4 Hz, 2H), 3.55 (q, J = 6.8 Hz, 2H), 1.15 (t, J = 6.8 Hz, 3H).

**Synthesis of compounds 10 and 11:** Compound **8** (200 mg, 0.49 mmol) and PPh<sub>3</sub> (195 mg, 0.74 mmol) were added to 20 mL of the mixed solvent [THF/H<sub>2</sub>O = 4:1 (v/v)] under nitrogen atmosphere. After stirred for 24 h at 60 °C, the solvent was removed under vacuum. The residue was purified by column chromatography to give a bright red solid (125 mg, 66.8%). <sup>1</sup>H NMR (400 MHz, DMSO-d<sub>6</sub>) δ (ppm): 8.52 (s, 1H), 8.14 (d, J = 15.3 Hz, 1H), 8.02 (d, J = 7.6 Hz, 1H), 7.77 (d, J = 15.3 Hz, 1H), 7.56 (t, J = 7.2 Hz, 1H), 7.50 (d, J = 8.9 Hz, 1H), 7.05-6.99 (m, 2H), 6.90 (d, J = 9.0 Hz, 1H), 6.70 (s, 1H), 3.52 (q, J = 6.9 Hz, 2H), 3.43 (t, J = 7.3 Hz, 2H), 2.76 (t, J = 7.2 Hz, 2H), 1.14 (t, J = 6.9 Hz, 3H). Compound **11** was obtained as a bright red solid (60 mg, 64.3%) by the same procedures with compound **9** instead of compound **8**. <sup>1</sup>H NMR (400 MHz, DMSO-d<sub>6</sub>) δ (ppm): 8.54 (s, 1H), 8.09 – 8.03 (m, 3H), 7.69 (d, J = 5.5 Hz, 2H), 7.66 (d, J = 2.6 Hz, 2H), 7.60 (d, J = 7.7 Hz, 2H), 7.56 (d, J = 9.1 Hz, 1H), 6.89 (dd, J<sub>1</sub> = 2.3 Hz, J<sub>2</sub> = 9.0 Hz, 1H), 6.79 (d, J = 2.2 Hz, 1H), 3.64 (t, J = 7.0 Hz, 2H), 3.52 (q, J = 6.8 Hz, 2H), 3.01 (t, J = 7.1 Hz, 2H), 1.14 (t, J = 7.0 Hz, 3H).

**Synthesis of SPS1 and SPS2:** Biotin (65 mg, 0.26 mmol), EDC·HCl (62 mg, 0.31 mmol), HOBT (53 mg, 0.31 mmol) and Et<sub>3</sub>N (65 μL, 0.47 mmol) were dissolved in freshly distilled DMF (5 mL) and stirred at room temperature for 50 min. Then 100 mg of compounds **10** (0.26 mmol) were added to the above solution. After stirred for another 5 h, the mixture was poured into 100 mL of ice water. The precipitate was washed in turn with saturated NH<sub>4</sub>Cl, saturated NaHCO<sub>3</sub>, brine and then purified with column chromatography to give a bright red solid (95 mg, 59.5%). <sup>1</sup>H NMR (400MHz, DMSO-d<sub>6</sub>) δ (ppm): 12.64 (s, 1H), 8.50 (s, 1H), 8.12 (d, J = 15.3 Hz, 1H), 8.04 – 8.00 (m, 1H), 7.75 (d, J = 15.3 Hz, 1H), 7.55 (t, J = 8.3 Hz, 1H), 7.49 (d, J = 9.0 Hz, 1H), 7.03 – 6.98 (m, 2H), 6.86 (dd, J<sub>1</sub> = 1.7 Hz, J<sub>2</sub> = 8.9 Hz, 1H), 6.71 (d, J = 1.4 Hz, 1H), 6.45 (s, 1H), 6.39 (s, 1H), 4.32 - 4.28 (m, 1H), 4.13- 4.10 (m, 1H), 3.51 - 3.43 (m, 4H), 3.25 (q, J = 6.1 Hz, 2H), 3.09 - 3.04 (m, 1H), 2.81 (dd, J<sub>1</sub> = 5.0 Hz, J<sub>2</sub> = 12.5 Hz, 1H), 2.58 (d, J = 12.4 Hz, 1H), 2.06 (t, J = 7.3 Hz, 2H), 1.64 – 1.23 (m, 6H), 1.13 (t, J = 6.8 Hz, 3H). <sup>13</sup>C NMR (400MHz, DMSO-d<sub>6</sub>) δ (ppm): 193.7, 173.1, 163.2, 162.3, 160.4, 157.0, 153.1, 146.6, 140.7, 136.6, 131.2, 130.5, 121.2, 120.6, 119.7, 118.3, 113.7, 110.6, 109.2, 97.1, 61.5, 59.7, 55.9, 49.4, 45.9, 45.4, 36.6, 35.7, 28.7, 28.5, 25.6,

12.5. HR-MS  $m/z$ : 605.2430 (M+H)<sup>+</sup>; calculated molecular weight of C<sub>32</sub>H<sub>36</sub>N<sub>4</sub>O<sub>6</sub>S: 605.2389 for (M+H)<sup>+</sup>. SPS2 was obtained a bright red solid (95 mg, 59.5%) by the same procedures with compound **11** instead of compound **10**. <sup>1</sup>H NMR (400 MHz, DMSO-d<sub>6</sub>) δ (ppm): 8.51 (s, 1H), 8.07-8.03 (m, 3H), 7.69-7.65 (m, 2H), 7.61-7.57 (m, 2H), 7.53 (d, J = 8.9 Hz, 1H), 6.89 (d, J = 8.8 Hz, 1H), 6.74 (s, 1H), 6.43 (s, 1H), 6.37 (s, 1H), 4.31-4.28 (m, 1H), 4.12-4.10 (m, 1H), 3.52-3.44 (m, 4H), 3.26 (q, J = 6.0 Hz, 2H), 3.17 (d, J = 5.2 Hz, 1H), 2.81 (dd, J<sub>1</sub> = 5.9 Hz, J<sub>2</sub> = 12.4 Hz, 1H), 2.57 (d, J = 12.4 Hz, 1H), 2.07 (t, J = 7.2 Hz, 1H), 1.63 – 1.40 (m, 3H), 1.21 – 1.12 (m, 6H). <sup>13</sup>C NMR (400MHz, DMSO-d<sub>6</sub>) δ (ppm): 189.4, 173.1, 163.2, 160.5, 156.8, 152.9, 146.1, 139.8, 138.4, 133.4, 131.1, 129.3, 128.6, 121.5, 114.0, 110.5, 109.1, 97.1, 61.5, 59.6, 55.9, 49.4, 45.9, 45.4, 36.6, 35.7, 28.7, 28.5, 25.6, 12.5. HR-MS  $m/z$ : 589.2487 (M+H)<sup>+</sup>, 314.1015 (M+H+K)<sup>2+</sup>/2; calculated molecular weight of C<sub>32</sub>H<sub>36</sub>N<sub>4</sub>O<sub>5</sub>S: 589.2440 for (M+H)<sup>+</sup>, 314.1061 for (M+H+K)<sup>2+</sup>/2.

## 2. Materials and Reagents

All the chemicals were purchased from Aladdin Corporation and used without further purification. Ultra-pure water was prepared by Sartorius Arium 611DI system.

## 3. Spectral measurements

Stock solutions of SPS1-2 ( $3 \times 10^{-4}$  M) in DMF, biotin ( $14.4 \times 10^{-3}$  M) in phosphate buffer solution (PBS, 10 mM, pH 7.0) and 1 mg/mL of streptavidin (SA) /avidin (AV) in PBS were prepared in advance. The stock solutions of the dyes were diluted with corresponding solvents to acquired 3 μM dye solutions. Absorption spectra were measured with an Evolution 220 UV-vis spectrophotometer (Thermo Scientific). Fluorescent spectra were carried out in a Lumina Fluorescence Spectrometer (Thermo Scientific). NMR spectra were performed with a Bruker AV-400 spectrometer (400M Hz). Mass spectra were recorded on a MA 1212 Instrument using standard condition (ESI, 70 ev). Time-resolved fluorescent data were acquired with an Edinburgh FL900 Fluorescence spectrometer equipped with a laser ( $\lambda_{\text{ex}} = 441$  nm). A di-exponential function was used to fit the fluorescence decay.

## 4. SA/AV Titrations

20 μL of the dye stock solution were added to 2 mL of phosphate buffer solution (10 mM, pH 7.0) to keep [SPS1] = [SPS2] = 3 μM / 0.3 μM. 0 - 100 μL of 1 mg/mL SA/AV-PBS were added into the above solution to obtain appreciate concentrations of SA/AV.

## 5. Binding ratio of SA/AV to SPS2

200 μL of 1 mg/mL SA (AV) stock solution were added to 1.80 mL of phosphate buffer solution to make [SA] = [AV] = 100 μg/mL (1.5 μM). 0-72 μL of the dye stock solution was added into the above solution to acquire different ratios of dye/protein.

## 6. Living cell culture and fluorescence imaging

HeLa cells were cultured in Dulbecco's modified Eagle's medium (DMEM) supplemented with 10% fetal bovine serum (FBS) at 37 °C and under 5% CO<sub>2</sub> in a CO<sub>2</sub> incubator. The cells were washed with phosphate buffered solution (PBS) and incubated with SPS2 (10 μM) in DMEM for 1 h at 37 °C and washed 3 times with PBS. For the control experiment, the cells were pre-incubated with 10 μM biotin for 1 h, then incubated with 10 μM of SPS2 for another 1 h. Cell imaging was carried out after washing cells with PBS. Emission was collected at 550-560 nm for green channel and 590-600 nm for red channel. The excited wavelength was set at 488 nm.

## 7. Determination of the detection limit

The limit of detection (LOD) was obtained by  $3S_b/k$ , where  $S_b$  is the standard deviation of the blank measurements of 10 times, and  $k$  is the slope of the fitted line.

### **8. Cell viability assay**

The cell viability of SPS2 was the same as that in the reference (S. Bhuniya, S. Maiti, E.-J. Kim, H. Lee, J. L. Sessler, K. S. Hong and J. S. Kim, *Angew. Chem. Int. Ed.*, 2014, **53**, 4469).

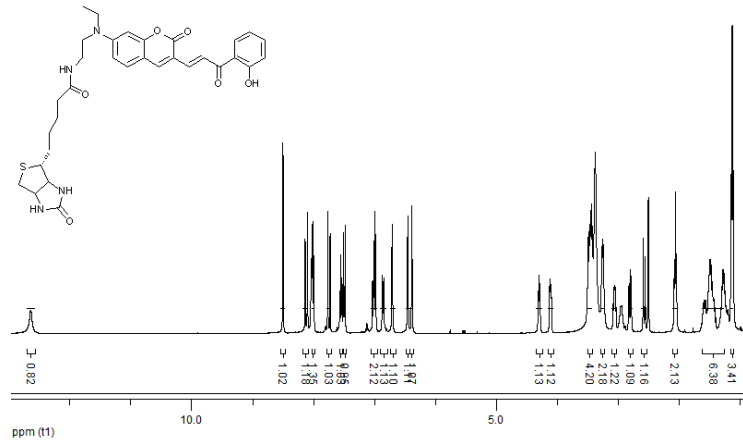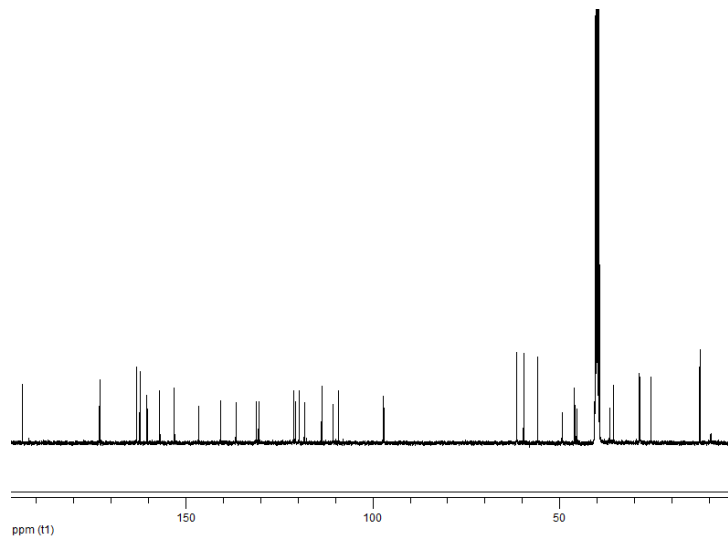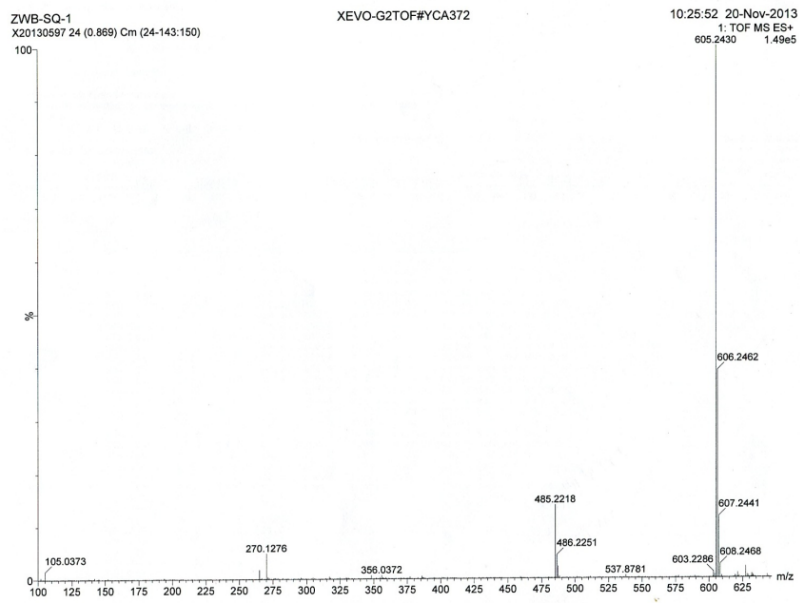

Fig. S1 <sup>1</sup>H-NMR, <sup>13</sup>C-NMR and HR-MS spectra of SPS1.

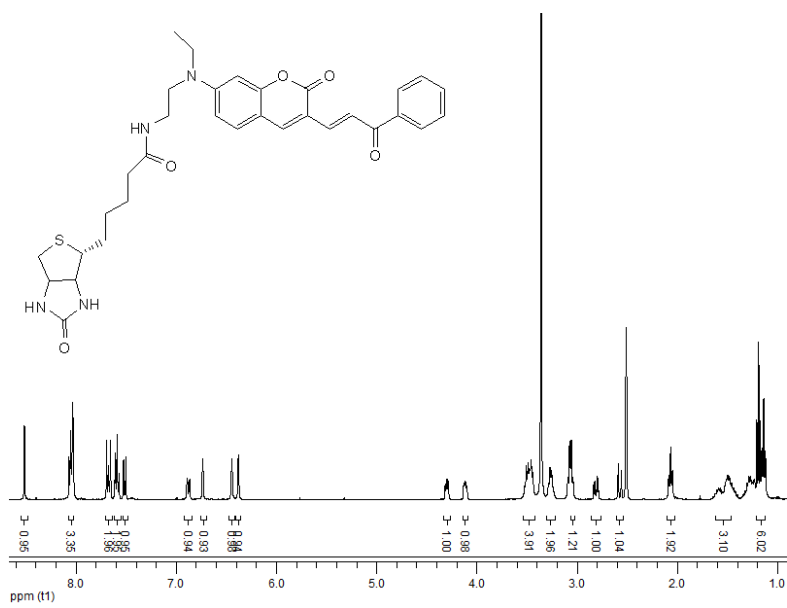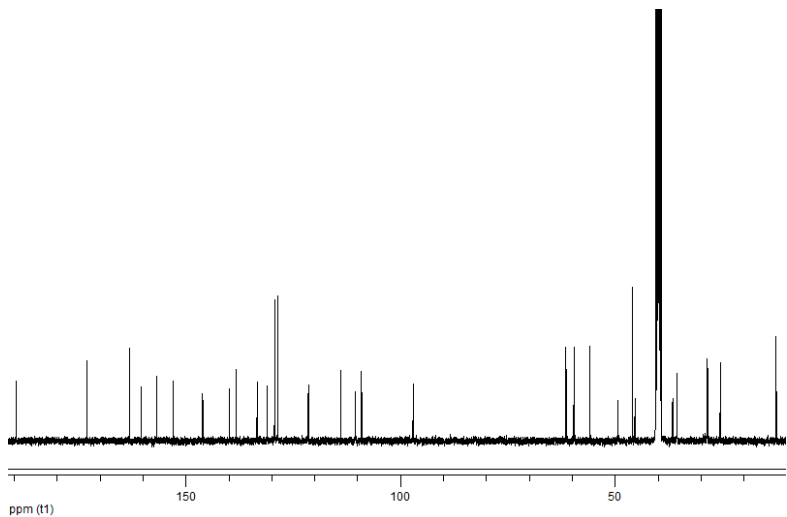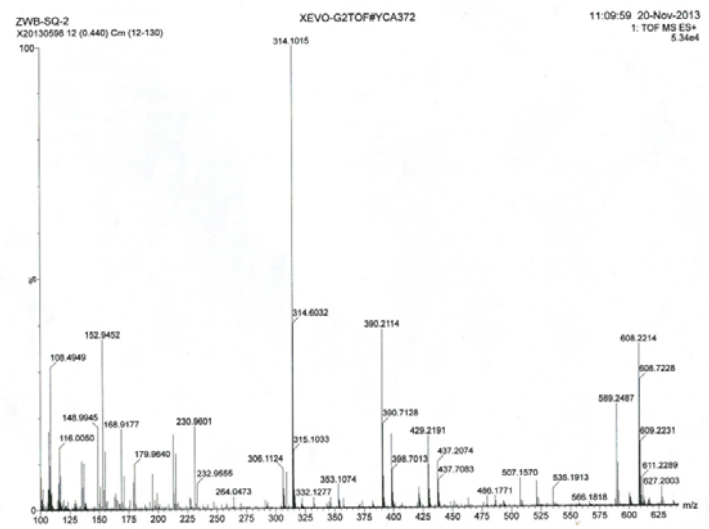

Fig. S2  $^1\text{H-NMR}$ ,  $^{13}\text{C-NMR}$  and HR-MS spectra of SPS2.



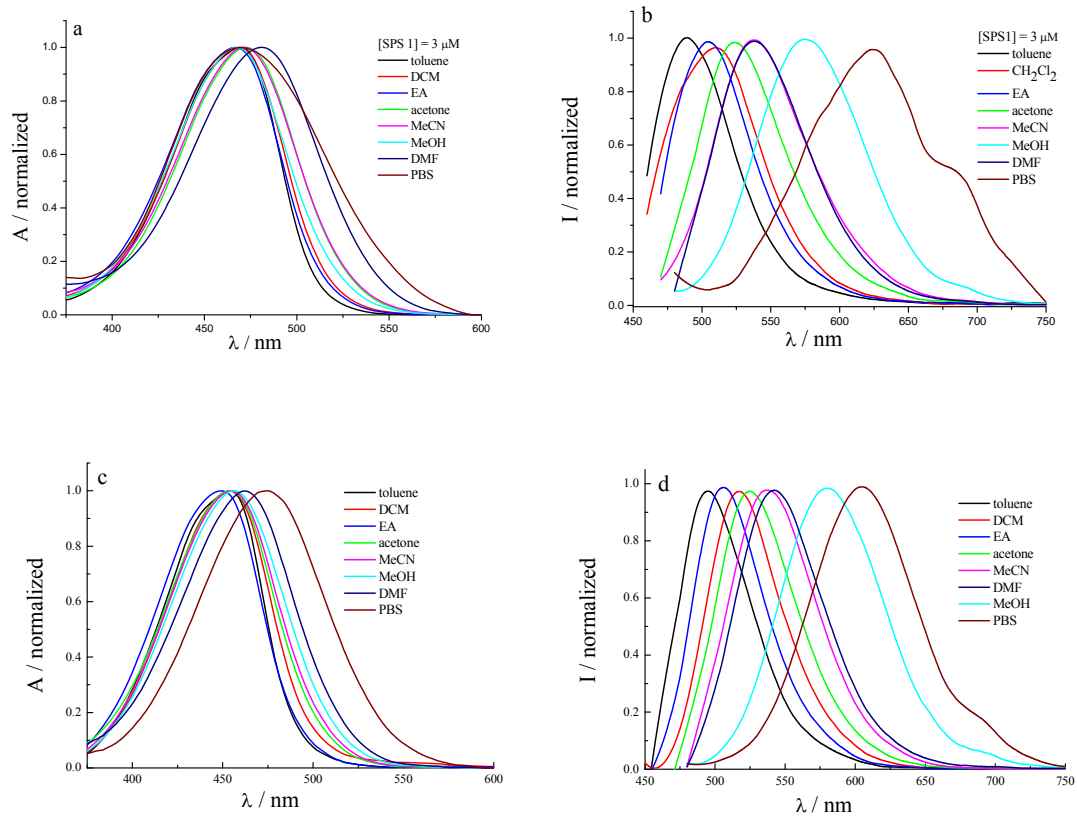

**Fig. S3** The normalized absorption and emission spectra of SPS1(a, b) and SPS2 (c, d) in various solvents, [SPS1] = [SPS2] = 3 μM.

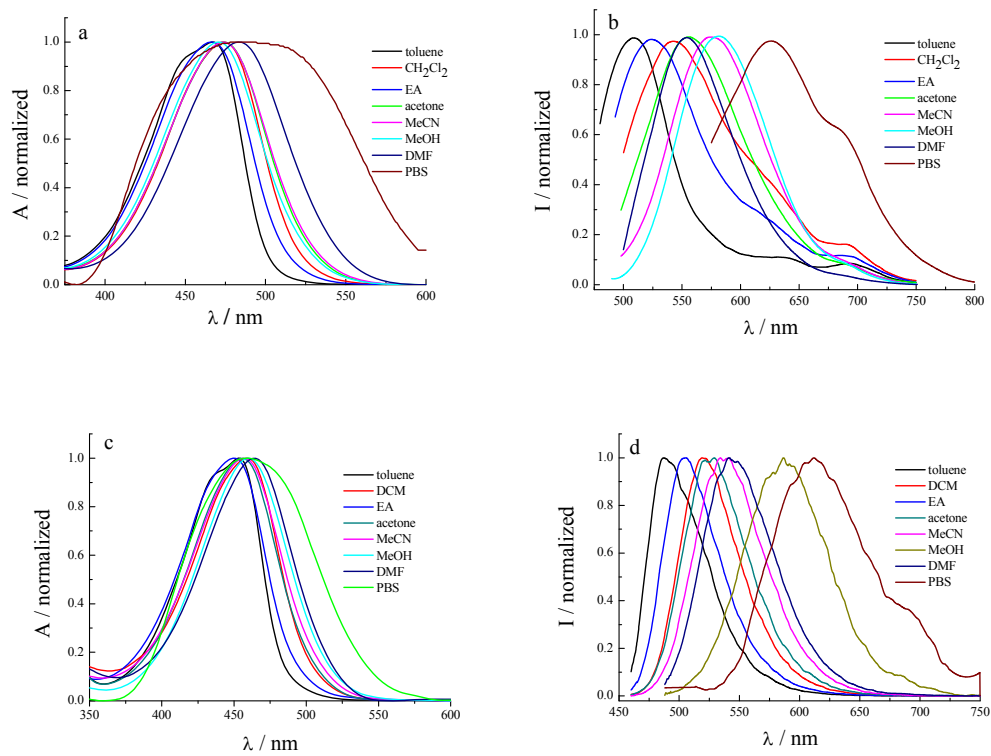

**Fig. S4** The normalized absorption and emission spectra of RC1(a, b) and RC2 (c, d) in various solvents, [RC1] = [RC2] = 3 μM.

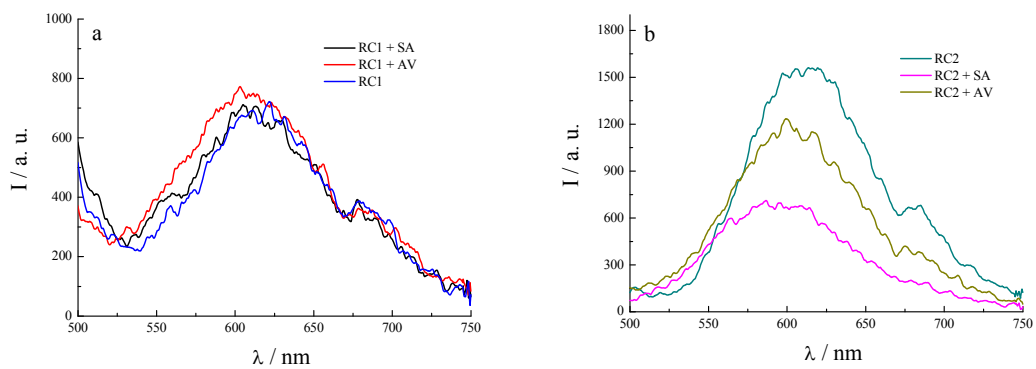

**Fig. S5** The emission spectra of RC1 (a) and RC2 (b) with and without SA/AV. 10 mM PBS, pH 7.0; [RC1] = [RC2] = 3.0  $\mu$ M, [SA] = [AV] = 1.5  $\mu$ M;  $\lambda_{\text{ex}}$  = 465 nm.

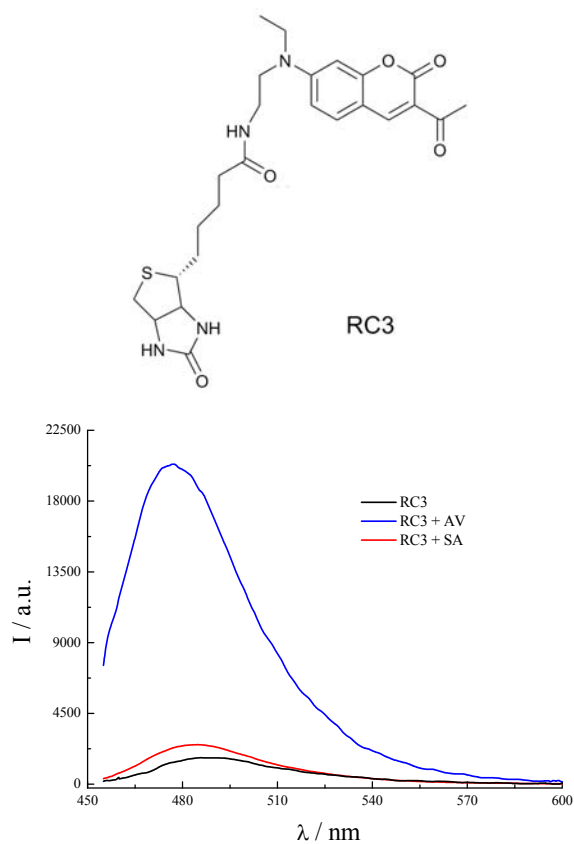

**Fig. S6** The emission spectra of the reference compound RC3 with or without SA/AV. 10 mM PBS, pH 7.0; [RC3] = 3.0  $\mu$ M, [SA] = [AV] = 1.5  $\mu$ M;  $\lambda_{\text{ex}}$  = 435 nm.

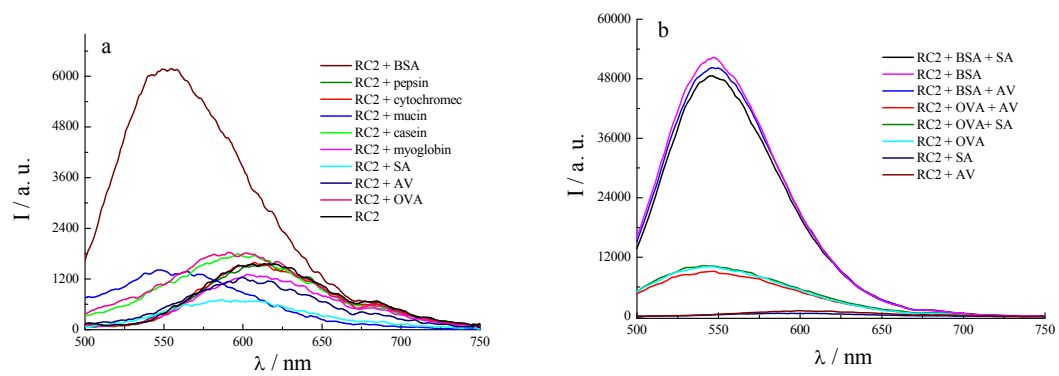

**Fig. S7** The fluorescence spectra of RC2 in the presence of 0.1 mg/mL of various proteins (a) and the competition of RC2 toward BSA and OVA over SA/AV (b). [RC2] = 3.0  $\mu$ M, [SA] = [AV] = 0.1 mg/mL, [BSA] = [OVA] = 1.0 mg/mL; 10 mM PBS, pH 7.0;  $\lambda_{\text{ex}}$  = 465 nm.

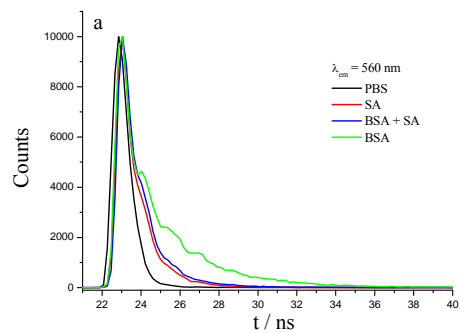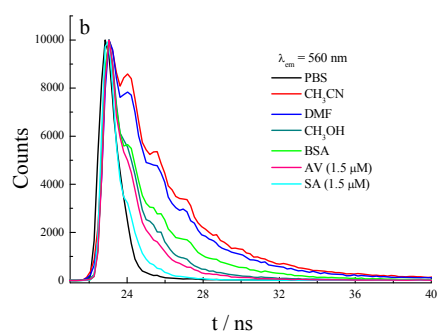

**Fig. S8** The the fluorescence decay curves of SPS2 in different systems ( $\lambda_{ex} = 441$  nm,  $\lambda_{em} = 560$  nm).

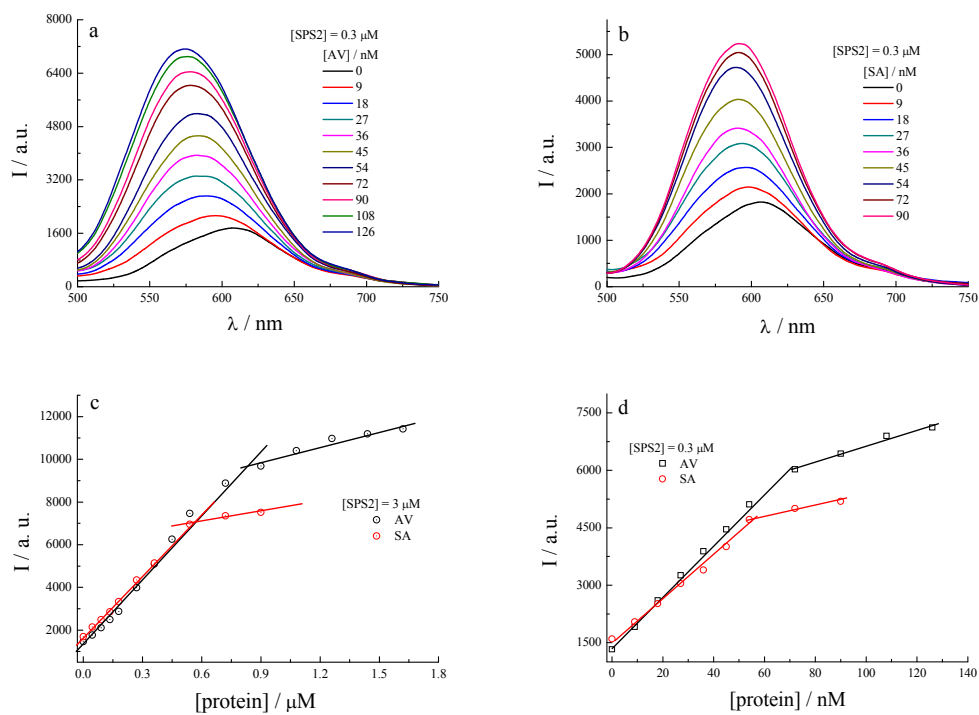

**Fig. S9** The emission spectra of SPS2 ( $0.3 \mu\text{M}$ , both slits were  $10 \text{ nm}$ ) with different concentrations of AV/SA (a-b), the fluorescence intensity of SPS2 at  $576 \text{ nm}$  as a function of AV/SA concentration (c, d) ( $10 \text{ mM PBS}$ ,  $\text{pH } 7.0$ ,  $\lambda_{\text{ex}} = 465 \text{ nm}$ ).

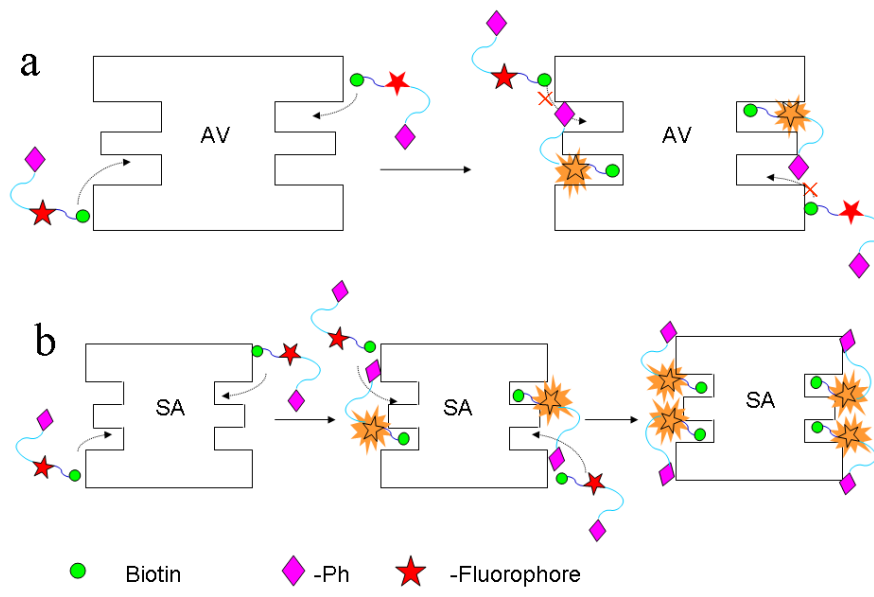

**Fig. S10** The proposed binding models of SPS2 to AV/SA.



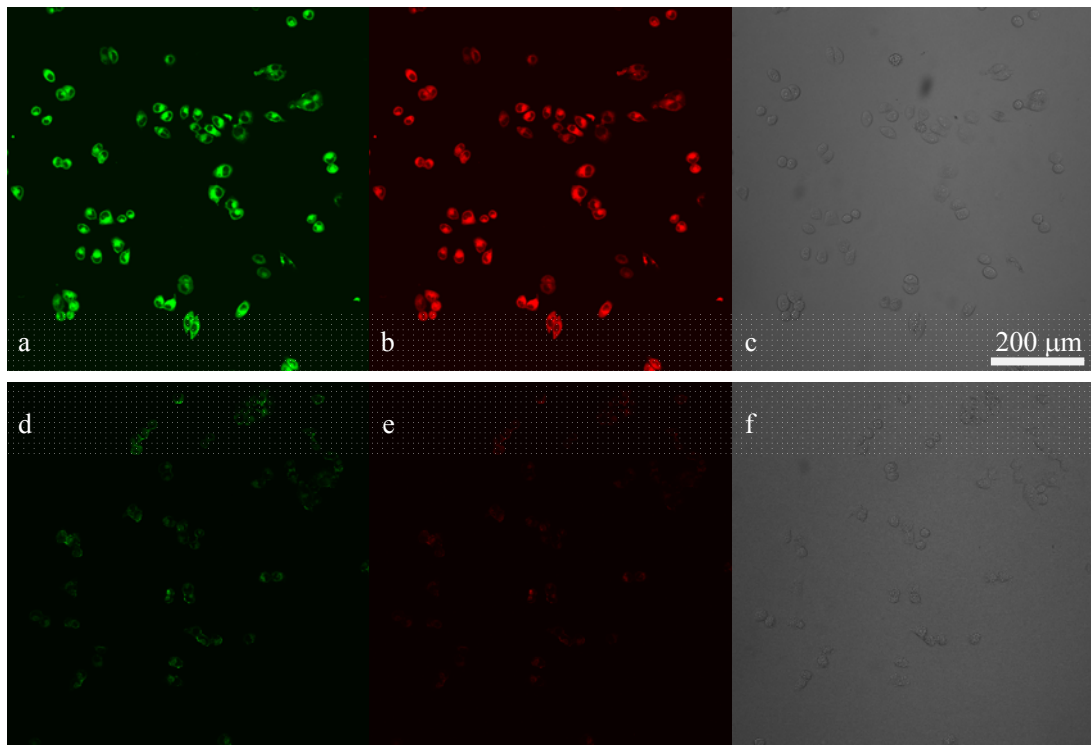

**Fig. S11** Confocal laser fluorescence (a-b, d-e), bright-field (c, f) images of living HeLa cells incubated with SPS2 (10  $\mu\text{M}$ ) for 60 min (a-c) and pretreated with 10  $\mu\text{M}$  biotin for 1h (d-f) followed by incubated with SPS2 for another 1h. Excited at 488 nm; (a, d) green channel; (b, e) red channel.

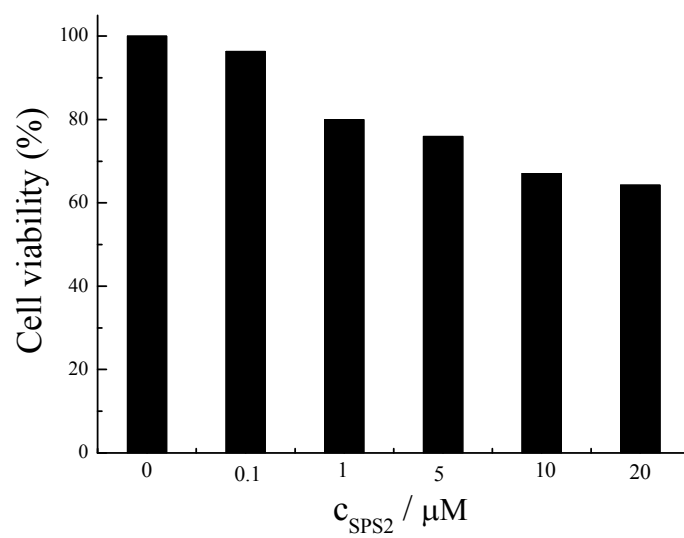

**Fig. S12** Cell viability of HeLa cells pretreated with various concentrations of SPS2 in PBS. After treatment, the cells were incubated for 24 h. Cell viability was assessed using a standard MTT assay.

**Table 1.** The absorption and emission maxima, Stokes shifts and fluorescence quantum yields of SPS1-2 and RC1-2 in various solvents.

| Solvents         | dyes | $\lambda_{ab}/\text{nm}$ | $\lambda_{em}/\text{nm}$ | Stokes shift/ $\text{nm}$ | $\Phi_f^a$ |
|------------------|------|--------------------------|--------------------------|---------------------------|------------|
| toluene          | SPS1 | 469                      | 488                      | 19                        | 0.0047     |
|                  | RC1  | 467                      | 508                      | 31                        | 0.0001     |
|                  | SPS2 | 454                      | 495                      | 41                        | 0.58       |
|                  | RC2  | 453                      | 491                      | 38                        | 1.00       |
| dichloromethane  | SPS1 | 469                      | 510                      | 41                        | 0.0036     |
|                  | RC1  | 474                      | 541                      | 67                        | 0.0002     |
|                  | SPS2 | 454                      | 517                      | 63                        | 0.41       |
|                  | RC2  | 459                      | 499                      | 53                        | 1.00       |
| ethylacetate     | SPS1 | 467                      | 495                      | 28                        | 0.0039     |
|                  | RC1  | 466                      | 524                      | 58                        | 0.0002     |
|                  | SPS2 | 449                      | 506                      | 57                        | 0.48       |
|                  | RC2  | 450                      | 506                      | 56                        | 1.00       |
| acetone          | SPS1 | 472                      | 514                      | 42                        | 0.0040     |
|                  | RC1  | 474                      | 556                      | 82                        | 0.0007     |
|                  | SPS2 | 454                      | 525                      | 71                        | 0.46       |
|                  | RC2  | 456                      | 526                      | 70                        | 1.00       |
| acetonitrile     | SPS1 | 471                      | 528                      | 57                        | 0.0032     |
|                  | RC1  | 474                      | 573                      | 99                        | 0.0009     |
|                  | SPS2 | 455                      | 537                      | 82                        | 0.49       |
|                  | RC2  | 457                      | 537                      | 80                        | 0.88       |
| Methanol         | SPS1 | 468                      | 555                      | 87                        | 0.0058     |
|                  | RC1  | 471                      | 581                      | 100                       | 0.0034     |
|                  | SPS2 | 457                      | 578                      | 121                       | 0.19       |
|                  | RC2  | 459                      | 587                      | 128                       | 0.18       |
| DMF              | SPS1 | 482                      | 518                      | 36                        | 0.024      |
|                  | RC1  | 482                      | 553                      | 71                        | 0.0077     |
|                  | SPS2 | 462                      | 524                      | 80                        | 0.48       |
|                  | RC2  | 464                      | 544                      | 80                        | 0.71       |
| PBS <sup>b</sup> | SPS1 | 470                      | 625                      | 155                       | 0.0031     |
|                  | RC1  | 488                      | 626                      | 138                       | 0.0044     |
|                  | SPS2 | 475                      | 605                      | 130                       | 0.0090     |
|                  | RC2  | 458                      | 611                      | 153                       | 0.0016     |

Coumarin 153 ( $\Phi_f = 0.38$  in ethanol) was used as the reference; <sup>b</sup> containing 1% DMF

Table S2 the life time and relative amplitudes  $\alpha$  of the two time components in the fluorescence decays of SPS2 (3  $\mu$ M) in different systems at emission maxima ( $\lambda_{\text{ex}} = 465$  nm)

| Solvent            | $\tau_1/\text{ns}$ ( $\alpha_1$ /%) | $\tau_2/\text{ns}$ ( $\alpha_2$ /%) | $\tau_f / \text{ns}$ |
|--------------------|-------------------------------------|-------------------------------------|----------------------|
| PBS                | 0.46 (74.1)                         | 2.19 (25.9)                         | 0.90                 |
| CH <sub>3</sub> OH | 1.10 (59.8)                         | 3.69 (40.2)                         | 2.08                 |
| CH <sub>3</sub> CN | 2.82 (72.7)                         | 21.64 (27.3)                        | 7.96                 |
| DMF                | 2.85 (65.9)                         | 15.88 (43.1)                        | 7.29                 |
| Toluene            | 2.83 (47.5)                         | 12.24 (52.5)                        | 7.77                 |
| SA                 | 0.29 (13.4)                         | 1.19 (86.6)                         | 1.07                 |
| AV                 | 1.52 (79.1)                         | 2.82 (20.9)                         | 1.79                 |
| BSA                | 3.06 (100)                          |                                     | 3.06                 |
| BSA+SA             | 1.71 (100)                          |                                     | 1.71                 |
